# Supplementary material
Source: PubMed Central journal article supplement (PMC3486049)
Supplement: IAI.00554-12_zii999099874so1.pdf [file IAI.00554-12_zii999099874so1.pdf]

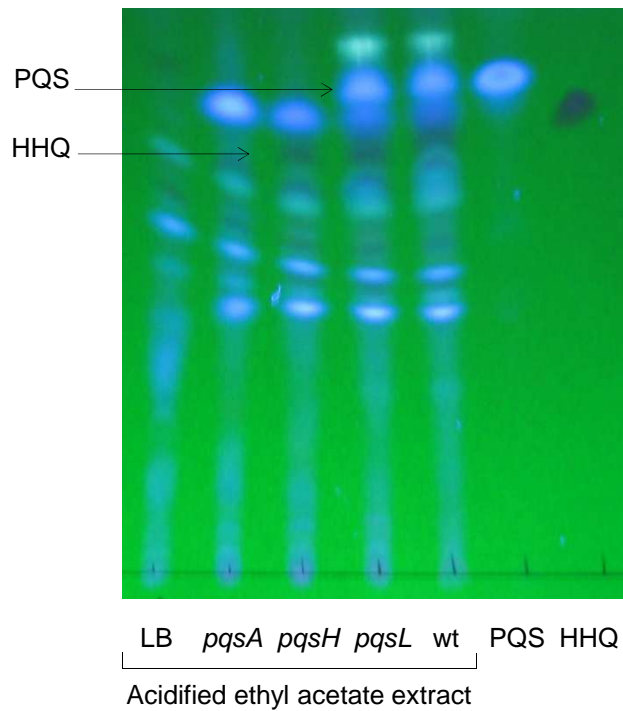

**Fig. S1. Detection of *P. aeruginosa* AQ signaling molecules by Thin-Layer Chromatography (TLC).** Two microliters of acidified ethyl acetate extracts from LB (control) or from cell-free culture supernatants of *P. aeruginosa* PA14 *pqsA*, *pqsH*, *pqsL* mutants or PA14 wt or PQS and HHQ standards (20 nmol) were spotted on TLC plate and migrated in a mixture of dichloromethane:methanol (95:5) prior to visualization at 312 nm.

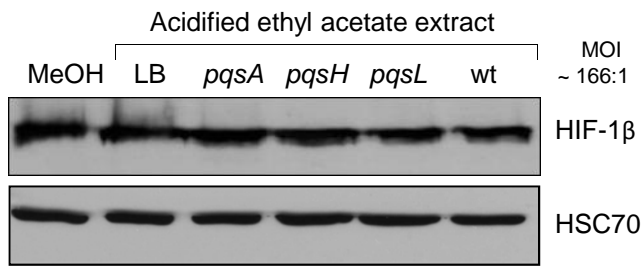

**Fig. S2. *P. aeruginosa* AQ signaling molecules do not affect HIF-1β protein levels.** Expression of HIF-1β (from BD transduction Laboratories - 611078 - Clone 29) and HSC70 (loading control) proteins in airway epithelial cells (IB3-1 cells) treated with methanol (MeOH) or acidified ethyl acetate extracts from LB (control) or from cell-free culture supernatants of *P. aeruginosa* PA14 *pqsA*, *pqsH*, *pqsL* mutants or PA14 wt at a dilution corresponding to a MOI of 166:1 for 16 h.

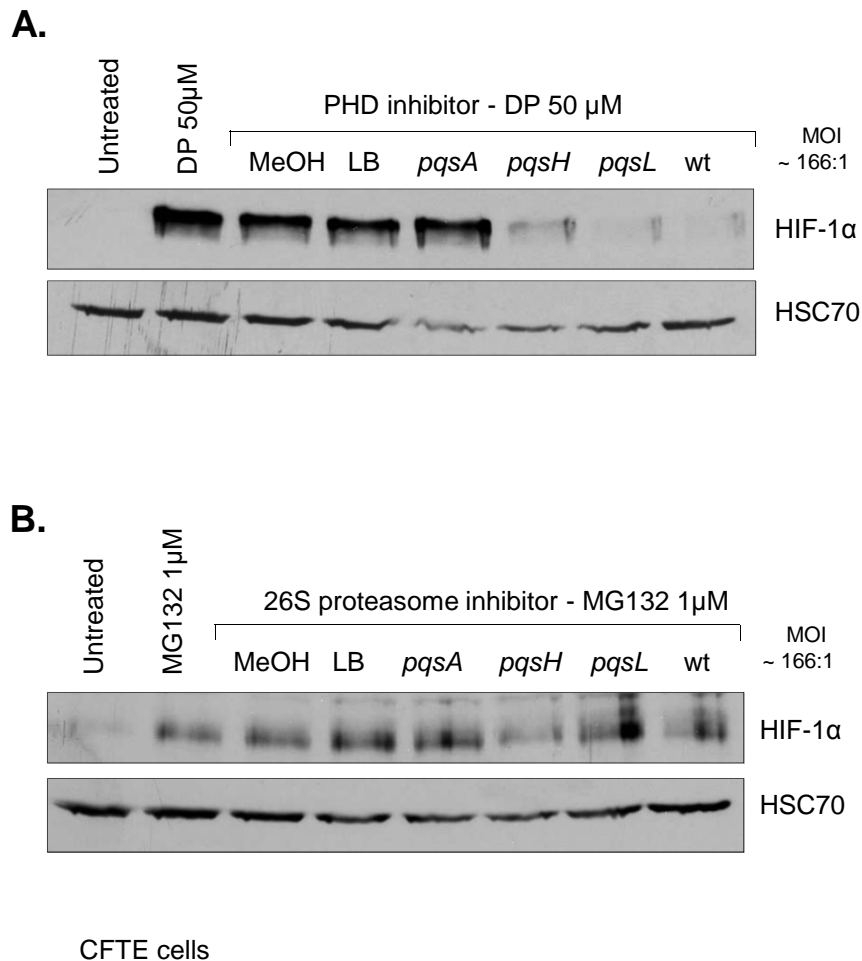

**Fig. S3. *P. aeruginosa* AQ signaling molecules mediate HIF-1 $\alpha$  degradation via a PHD-independent but 26S proteasome-dependent mechanism in CFTE cells.** Expression of HIF-1 $\alpha$  and HSC70 (loading control) proteins in airway epithelial cells (CFTE cells) untreated or treated with the PHD inhibitors **A.** 2,2'-dipyridyl DP (50  $\mu$ M) or with the 26S proteasome inhibitors **B.** Z-Leu-Leu-Leu-al MG132 (1  $\mu$ M) alone or in association with methanol (MeOH), acidified ethyl acetate from LB (control) or from cell-free culture supernatants of *P. aeruginosa* PA14 *pqsA*, *pqsH*, *pqsL* mutants or PA14 wt at a dilution corresponding to a MOI of 166:1 for 16 h.

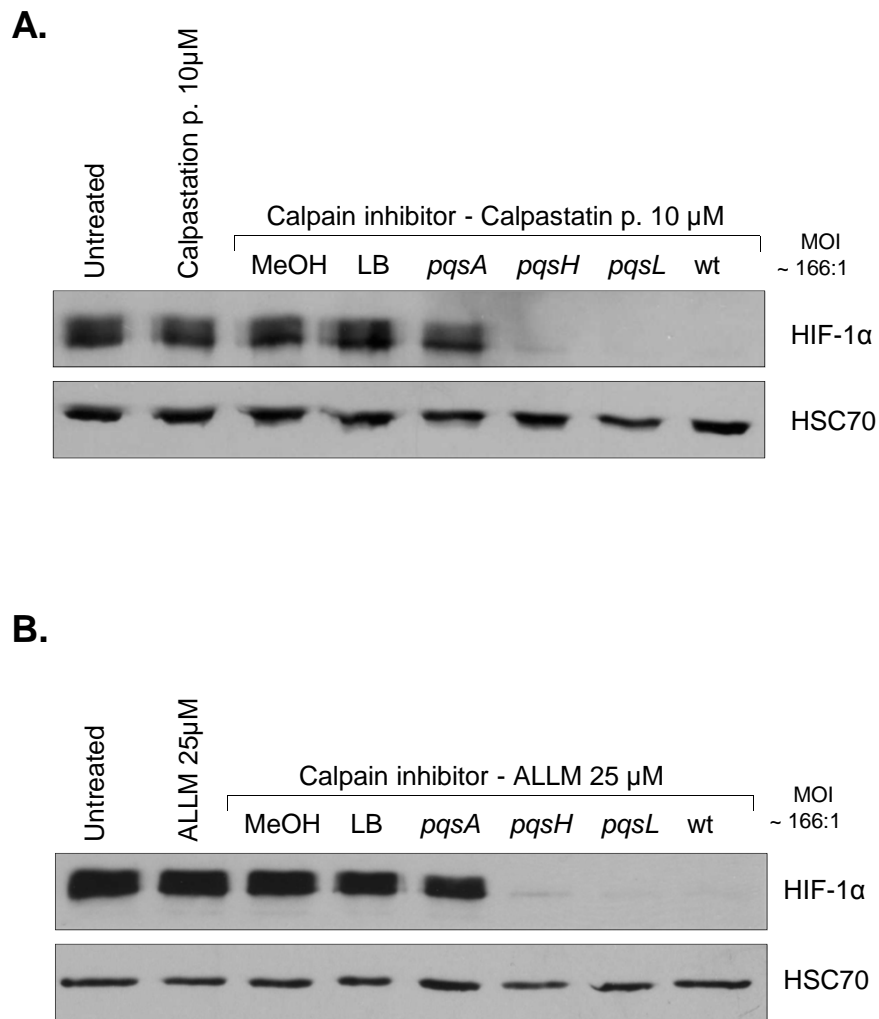

**Fig. S4. *P. aeruginosa* AQ signaling molecules mediate HIF-1 $\alpha$  degradation through a calpain-independent mechanism.** Expression of HIF-1 $\alpha$  and HSC70 (loading control) proteins in airway epithelial cells (IB3-1 cells) untreated or treated with calpain inhibitors **A.** calpastatin peptide (10  $\mu$ M) or **B.** N-Acetyl-Leu-Leu-Methional (ALLM) (25  $\mu$ M) alone or in association with methanol (MeOH), acidified ethyl acetate from LB (control) or from cell-free culture supernatants of *P. aeruginosa* PA14 *pqsA*, *pqsH*, *pqsL* mutants or PA14 wt at a dilution corresponding to a MOI of 166:1 for 16 h.
